1 **Men's Willingness to Receive Text Messages and Talk with an HIV counselor from the**  
2 **National HIV Hotline in Tanzania for Support with Linkage to Care Following HIV**  
3 **self-testing**

4  
5  
6 Frank Mhando<sup>1,2</sup> Kelia Olughu<sup>3</sup>, Marwa Nyankomo<sup>1</sup>, James S. Ngocho<sup>4</sup>, Ivan Teri<sup>5</sup>, Gaspar  
7 Mbita<sup>6</sup>, BRIDGE Africa Team<sup>7</sup>, Donaldson F. Conserve<sup>3</sup>  
8

9 <sup>1</sup>Ifakara Health Institute, Bagamoyo Research and Training Centre, Bagamoyo, United  
10 Republic of Tanzania

11 <sup>2</sup>Johannesburg Business School, University of Johannesburg, Johannesburg, South Africa

12 <sup>3</sup>Milken Institute School of Public Health, The George Washington University, Washington,  
13 DC, USA

14 <sup>4</sup>Department of Epidemiology and Applied Biostatistics, Kilimanjaro Christian Medical  
15 University College, Moshi Tanzania

16 <sup>5</sup>Elizabeth Glaser Pediatric AIDS Foundation, Washington, District of Columbia, USA

17 <sup>6</sup>Vrije Universiteit Amsterdam, Netherlands

18 <sup>7</sup>Building Research Implementation to Drive Growth and Equity (BRIDGE) Africa, Dar es  
19 Salaam, Tanzania  
20

21  
22 **Corresponding author**

23 Frank Mhando, MA.PPM

24  
25 [frank.mhando@gmail.com](mailto:frank.mhando@gmail.com) [ORCID: 0000-0002-0003-0053]

44  
45  
46  
47  
48  
49  
50  
51  
52  
53  
54  
55  
56  
57  
58  
59  
60  
61  
62  
63  
64  
65  
66  
67  
68  
69  
70  
71  
72  
73  
74  
75  
76  
77  
78  
79  
80  
81  
82  
83  
84  
85  
86  
87  
88  
89  
90  
91

## Abstract

**Background:** Tanzania faces a significant burden of HIV, with particular challenges in reaching men and ensuring timely linkage to care. To address these issues, HIV self-testing (HIVST) has been implemented to increase HIV testing and the National HIV Hotlines are being considered as a strategy to facilitate linkage to care. This study aimed to assess the willingness of Tanzanian men to receive support from use the National HIV Hotline via mobile phones for HIVST and linkage to care.

**Methods:** Data from 505 men from the baseline survey of a cluster-randomized controlled trial conducted in June 2019 with 18 social networks or “camps” in Dar es Salaam, Tanzania. Participants were 18-year-old or older male camp members who were HIV-negative at the time of enrolment. Logistic regression models were used to assess factors associated with men’s comfort with talking with an HIV counselor over the phone.

**Results:** There were 505 heterosexual male participants enrolled in the study with an average age of 29 years. Logistic regression demonstrated that comfortability texting a friend about HIV self-testing (OR = 3.37, 95% CI [1.97 – 5.76], being comfortable texting a friend about HIV (OR = 3.84, 95% CI [2.20 – 6.72], previous history of receiving HIV related text messages (aOR = 0.55, 95% CI [0.31 – 0.99] were significantly associated with men’s s comfortability talking to a HIV counselor on the National HIV Hotline following HIVST. The factors such as participants’ comfortability texting friend about HIVST (OR = 2.52, 95% CI [1.49 – 4.25]) and comfortability texting friend about HIV (OR = 2.96, 95% CI [1.83 – 4.80] were significantly associated with the probability of participant’s comfortability receiving text message from HIV counselor following HIVST.

**Conclusion:** These findings suggest an effort to develop and implement a user-friendly digital health intervention that promote comfortability, address private concerns, and deliver tailored support and information to individuals following HIV self-testing.

## Key words

HIV self-testing, the National HIV Hotline, linkage to care, mHealth

## 92 **Introduction**

93           Tanzania has one of the highest burdens of HIV in the world, with an estimated 1.4  
94 million people living with HIV in 2020 (1). The HIV prevalence among adults aged 15-64 is  
95 approximately 4.6%, and there were an estimated 36,000 new HIV infections in 2020 (2). HIV  
96 disproportionately affects certain populations in Tanzania, including women, young people,  
97 and key populations such as men who have sex with men, sex workers, and people who inject  
98 drugs (3). The government of Tanzania has made significant progress in its HIV response over  
99 the past decade, with increased access to HIV testing, treatment, and care services. As of 2020,  
100 approximately 82% of people living with HIV in Tanzania were aware of their status, and 82%  
101 of those who were aware of their status were receiving antiretroviral therapy (ART) (1,2).  
102 Additionally, the number of AIDS-related deaths has decreased by 43% since 2010 (2). Despite  
103 these gains, there are still significant challenges in the HIV response in Tanzania. Stigma and  
104 discrimination continue to be major barriers to testing, treatment, and care for people living  
105 with HIV, particularly for key populations. There are also challenges in reaching certain  
106 geographic areas and populations with HIV services, including rural areas and mobile  
107 populations.

108           In recent years there have been efforts to scale up innovative approaches to HIV testing,  
109 such as HIV self-testing, as a way to increase testing uptake and reach key populations (4–8).  
110 HIV self-testing (HIVST) has been shown to increase HIV testing uptake, particularly among  
111 populations that are hard to reach through traditional testing methods (8,9). HIVST has been  
112 shown to be acceptable and feasible in Tanzania, and is expected to increase HIV testing uptake  
113 (8,9).

114           HIVST was first introduced in Tanzania in 2017 and since then, the government has  
115 taken steps to promote its use as a means of increasing HIV testing uptake and improving  
116 access to testing among hard-to-reach populations (10). As of 2021, HIVST kits are available

117 for purchase in pharmacies, and can also be distributed through community-based programs.  
118 The Ministry of Health, Community Development, Gender, Elderly, and Children  
119 (MOHCDGEC) has approved several HIVST kits for use in Tanzania, including OraQuick and  
120 Atomo, and has developed guidelines for their use. However, the use of HIVST is still  
121 relatively low in Tanzania compared to other testing methods. Also, challenges remain in  
122 ensuring that individuals who test positive through HIVST receive follow-up care and  
123 treatment, as well as addressing issues related to stigma and discrimination. Testing is only the  
124 first step in the HIV care continuum, and linkage to care following HIVST is crucial for  
125 achieving the UNAIDS 95-95-95 targets (3).

126 Studies have shown that digital health interventions, such as mobile phone text  
127 messaging or smartphone applications, have the potential to facilitate linkage to care by  
128 providing timely support, reminders, and information to individuals who have received positive  
129 HIVST results (11–15).

130 In Tanzania, the efforts to improve medication adherence among people living with  
131 HIV (PLHIV) have included the implementation of various digital health interventions. One  
132 notable approach involves the use of reminder short message services (SMS) texts, wherein  
133 PLHIV receive timely reminders to take their medication (16). Another intervention method  
134 explored is the real-time medication monitoring (RTMM) device (17), such as the Wisepill,  
135 which provides not only reminders but also allows the challenges of lifelong adherence to ART,  
136 which remain a significant issue for PLHIV in Tanzania and other resource limited settings.  
137 While SMS reminders and RTMM devices may offer valuable support, they do not necessarily  
138 lead to significant improvement in adherence rates among PLHIV in Kilimanjaro, Tanzania  
139 (18). Additionally, the National HIV Hotline has emerged as a vital resource in HIV prevention,  
140 providing people with access to information, counselling, and support services in Tanzania.  
141 Through the National HIV Hotline, individual can seek guidance on medication adherence,  
142 receive timely reminders, and access assistance in overcoming barriers to treatment adherence.

143 However, it is not yet clear if HIVST users are willing to use the National HIV Hotline for  
144 support with linkage to care following HIV self-testing. This study aimed to investigate men's  
145 willingness to use the National HIV Hotline for linkage to care services after HIVST.

146

## 147 **Material and Methods**

### 148 **Data Source**

149 We utilized data from the baseline survey of the STEP (Self Testing Education Promotion)  
150 project, a five-year study funded by the National Institutes of Health (K99/R00MH110343) in  
151 Tanzania. The STEP project was conducted from 2018 in Dar es Salaam (the commercial  
152 capital of Tanzania and the city with the second-highest HIV prevalence) among heterosexual  
153 men aged 18 years and older (19). Participants of the STEP project were recruited from 18  
154 camps (social networks comprising mainly young men) in the Manzese and Tandale wards of  
155 Dar es Salam, Tanzania (20). Participants were recruited in June 2019 with the following  
156 inclusion criteria: (1) male, (2) aged 18 years or older, (3) been a camp member for at least  
157 three months, and (4) self-report as HIV-negative at enrollment (21). **Written informed consent**  
158 **was obtained from all participants prior to data collection. A total of 508 participants were**  
159 **screened; three participants did not meet eligibility criteria and 505 participants consented to**  
160 **participate into the study. The data used for analysis were accessed in April, 2023.**

### 161 **Measures**

162 The current study on men's willingness to use the National HIV Hotline for support with  
163 linkage to care following HIVST has two outcomes' variables; (1) comfortability talking with  
164 an HIV counselor on the National HIV hotline; and (2) comfortability receiving text messages  
165 from an HIV counselor. The outcome variables were measured with the questions *1) How*  
166 *comfortable would you feel talking with an HIV counselor on the National HIV hotline? And*  
167 *2) How comfortable would you feel receiving text messages from an HIV counsel on your*

168 *mobile phone?* Both questions were answered by 1) very comfortable 2) somewhat comfortable  
169 and 3) Uncomfortable.

170 There were seven explanatory variables considered, including the participant's role in the  
171 camp, history of receiving HIV-related text message, history of sending a text message to friend  
172 about HIV, comfortability texting close friend in camp about HIV, comfortability texting close  
173 friend about HIVST, willingness to receive information via mobile phone following HIVST,  
174 and comfortability sending self-test result via text.

### 175 **Statistical analysis**

176 The main study outcomes focused on the comfortability of individuals in talking to a HIV  
177 Counselor on the National HIV Hotline following HIV self-testing (HIVST) and receiving text  
178 messages from a HIV Counselor after HIVST. Categorical variables were summarized using  
179 frequencies, percentages, and p-values to examine their correlation with the primary outcomes.  
180 Logistic regression analysis models were utilized to assess the associations between  
181 explanatory variables and the outcome of interest, presenting odds ratios along with confidence  
182 intervals. Variables with a significance level of  $p < 0.10$  in bivariable analysis were included  
183 in the multivariable analysis. The multivariable logistic regression model was then applied to  
184 identify independent predictors of comfortability in talking to a HIV Counselor on the National  
185 HIV Hotline following HIVST and receiving text messages from a HIV Counselor after  
186 HIVST, with a significance level of  $p < 0.10$ . All statistical analyses were conducted using  
187 Stata statistical software, version 16.1. We described our categorical variables using the chi-  
188 square test, presenting frequencies, percentages, and p-values to assess the association between  
189 explanatory variables and our outcomes of interest. Logistic regression was then used for  
190 bivariate analysis, determining the likelihood of participant comfortability talking with an HIV  
191 counselor and comfortability receiving text messages from an HIV counselor. Significant  
192 variables ( $p < 0.10$ ) were identified, and unadjusted odds ratios (ORs) were calculated. In the

193 multivariate analysis, logistic regression explored factors affecting the comfortability of talking  
194 with an HIV counselor and the comfortability of receiving text messages from an HIV  
195 counselor. Variables with  $p < 0.10$  from bivariate analysis were included. All selected variables  
196 were analyzed using multiple logistic regression, with significance set at  $p < 0.10$ . Adjusted  
197 odds ratios (aORs) were calculated to understand variable relationships. Stata statistical  
198 software, version 16.1, was utilized for all analyses.(22)

199

## 200 **Results**

201 Our study had 505 participants, of which all were male, and most were single (63.8%), had  
202 secondary level education or greater (67.7%) and were in the age group 25 – 34 years (39.8%).  
203 Most of the participants had previously tested for HIV (90.3%), however, a majority had no  
204 history of using HIVST kit (91.5%). Regarding mobile phone access, the majority of the  
205 participants reported having a mobile phone (98.0%) and few participants reported sharing the  
206 mobile phone with another individual (19.4%). A few participants had a history of receiving  
207 HIV-related text message (28.5%) and sending a friend in camp text message about HIV  
208 (22.2%). The majority of participants indicated being comfortable texting friend about HIVST  
209 (82.8%) but a few indicated being comfortable texting friend about HIV (52.7%). Of the 505  
210 participants, only 3.6% were aware of the National HIV Hotline. The majority of participants  
211 indicated being very comfortable talking to a HIV counselor on National HIV Hotline (84.2%)  
212 and receiving text from HIV Counselor (80.6%) following HIVST. Table 1 present the  
213 distribution of various characteristics and responses obtained from the study participants.

214 **Table 1:** Participants’ characteristics, including demographic characteristics and HIV and  
215 HIVST knowledge and use. Dar es Salaam (n = 505)

216

| <b>Characteristics</b>   | <b>Frequency<br/>(percentage)</b> | <b>Cumulative<br/>percent</b> |
|--------------------------|-----------------------------------|-------------------------------|
| <b>Age group (years)</b> |                                   |                               |
| 18 - 24                  | 200 (39.6)                        | 39.6                          |

|                                                                 |            |      |
|-----------------------------------------------------------------|------------|------|
| 25 - 34                                                         | 201 (39.8) | 79.4 |
| 35 +                                                            | 104 (20.6) | 100  |
| <b>Educational level</b>                                        |            |      |
| Primary or less                                                 | 163 (32.3) | 32.3 |
| Secondary or greater                                            | 342 (67.7) | 100  |
| <b>Marital status</b>                                           |            |      |
| Single                                                          | 322 (63.8) | 63.8 |
| Monogamous marriage / Cohabiting                                | 183 (36.2) | 100  |
| <b>Previous HIV Testing</b>                                     |            |      |
| No                                                              | 49 (9.7)   | 9.7  |
| Yes                                                             | 456 (90.3) | 100  |
| <b>Access to Mobile Phone</b>                                   |            |      |
| No                                                              | 10 (2.0)   | 2.0  |
| Yes                                                             | 495 (98.0) | 100  |
| <b>Participants sharing mobile phone with other individuals</b> |            |      |
| No                                                              | 407 (80.6) | 80.6 |
| Yes                                                             | 98 (19.4)  | 100  |
| <b>History of receiving HIV-related text message</b>            |            |      |
| No                                                              | 361 (71.5) | 71.5 |
| Yes                                                             | 144 (28.5) | 100  |
| <b>History of sending friend in camp text message about HIV</b> |            |      |
| No                                                              | 393 (77.8) | 77.8 |
| Yes                                                             | 112 (22.2) | 100  |
| <b>Comfortability texting friend about HIVST</b>                |            |      |
| No                                                              | 87 (17.2)  | 17.2 |
| Yes                                                             | 418 (82.8) | 100  |
| <b>Comfortability texting friend about HIV</b>                  |            |      |
| No                                                              | 266 (52.7) | 52.7 |
| Yes                                                             | 239 (47.3) | 100  |
| <b>Aware of National HIV Hotline</b>                            |            |      |
| No                                                              | 487 (96.5) | 96.5 |
| Yes                                                             | 18 (3.6)   | 100  |
| <b>Previous HIV Testing</b>                                     |            |      |
| No                                                              | 49 (9.7)   | 9.7  |
| Yes                                                             | 456 (90.3) | 100  |
| <b>Access to Mobile Phone</b>                                   |            |      |
| No                                                              | 10 (2.0)   | 2.0  |
| Yes                                                             | 495 (98.0) | 100  |
| <b>Participants sharing mobile phone with other individuals</b> |            |      |
| No                                                              | 407 (80.6) | 80.6 |
| Yes                                                             | 98 (19.4)  | 100  |
| <b>History of receiving HIV-related text message</b>            |            |      |
| No                                                              | 361 (71.5) | 71.5 |
| Yes                                                             | 144 (28.5) | 100  |
| <b>History of sending friend in camp text message about HIV</b> |            |      |
| No                                                              | 393 (77.8) | 77.8 |
| Yes                                                             | 112 (22.2) | 100  |
| <b>Comfortability texting friend about HIVST</b>                |            |      |
| No                                                              | 87 (17.2)  | 17.2 |



|                                                                                          |            |      |
|------------------------------------------------------------------------------------------|------------|------|
| Yes                                                                                      | 418 (82.8) | 100  |
| <b>Comfortability texting friend about HIV</b>                                           |            |      |
| No                                                                                       | 266 (52.7) | 52.7 |
| Yes                                                                                      | 239 (47.3) | 100  |
| <b>Comfortability talking to a HIV Counselor on National HIV Hotline following HIVST</b> |            |      |
| Uncomfortable                                                                            | 26 (5.1)   | 5.1  |
| Somewhat Comfortable                                                                     | 54 (10.7)  | 15.8 |
| Very Comfortable                                                                         | 425 (84.2) | 100  |
| <b>Comfortability receiving text from HIV Counselor following HIVST</b>                  |            |      |
| Uncomfortable                                                                            | 27 (5.3)   | 5.3  |
| Somewhat Comfortable                                                                     | 71 (14.1)  | 19.4 |
| Very Comfortable                                                                         | 407 (80.6) | 100  |

217

218 **Comfortability talking to a HIV Counselor on National HIV Hotline following HIVST**

219 In the bivariate analysis, we found that comfortability texting friend about HIVST (OR = 3.37,  
 220 95% CI [1.97 – 5.76]) and comfortability texting friend about HIV (OR = 3.84, 95% CI [2.20  
 221 – 6.72]) were significantly associated with the probability of participant’s comfortability  
 222 talking to a HIV counselor on National HIV Hotline following HIVST (Table 2).

223

224 In the multivariate analysis, after for the other predictor variables, we found that history of  
 225 receiving HIV-related text message, comfortability texting friend about HIVST, and  
 226 comfortability texting friend about HIV remained significantly associated with the probability  
 227 of participant’s comfortability talking to a HIV counselor on National HIV Hotline following  
 228 HIVST (Table 2). Participants with a previous history of receiving HIV related text message  
 229 had 0.55 higher odds of being very comfortable talking to a HIV counselor on National HIV  
 230 Hotline following HIVST (aOR = 0.55, 95% CI [0.31 – 0.99]). Participants who reported being  
 231 comfortable texting a friend about HIVST had 3.08 higher odds of being very comfortable  
 232 talking to a HIV counselor on National HIV Hotline following HIVST (aOR = 3.08, 95% CI  
 233 [1.73 – 5.48]). Finally, participants who reported being comfortable texting friend about HIV

234 had 3.39 higher odds of being very comfortable talking to a HIV counselor on National HIV  
 235 Hotline following HIVST (aOR = 3.39, 95% CI [1.89 – 6.07]).

236 **Table 2:** Logistic regression of the association between participants’ comfortability talking to  
 237 a HIV Counselor on National HIV Hotline following HIVST and predictor variables showing  
 238 unadjusted and adjusted odds ratio

239

| Characteristics                                                 | n (%)      | Unadjusted OR (95% CI) | P -Value | Adjusted OR (95% CI) | P -Value |
|-----------------------------------------------------------------|------------|------------------------|----------|----------------------|----------|
| <b>Previous HIV Testing</b>                                     |            |                        |          |                      |          |
| No                                                              | 49 (9.7)   | Reference              |          | Reference            |          |
| Yes                                                             | 456 (90.3) | 1.02 (0.46 – 2.27)     | 0.954    | 1.01 (0.43 – 2.38)   | 0.979    |
| <b>Access to Mobile Phone</b>                                   |            |                        |          |                      |          |
| No                                                              | 10 (2.0)   | Reference              |          | Reference            |          |
| Yes                                                             | 495 (98.0) | 0.56 (0.71 – 4.49)     | 0.590    | 0.85 (0.09 – 7.82)   | 0.887    |
| <b>Participants sharing mobile phone with other individuals</b> |            |                        |          |                      |          |
| No                                                              | 407 (80.6) | Reference              |          | Reference            |          |
| Yes                                                             | 98 (19.4)  | 1.49 (0.78 – 2.88)     | 0.228    | 1.35 (0.67 – 2.73)   | 0.407    |
| <b>History of receiving HIV-related text message</b>            |            |                        |          |                      |          |
| No                                                              | 361 (71.5) | Reference              | 0.102    | Reference            | 0.048    |
| Yes                                                             | 144 (28.5) | 0.66 (0.40 – 1.09)     |          | 0.55 (0.31 – 0.99)   |          |
| <b>History of sending friend in camp text message about HIV</b> |            |                        |          |                      |          |
| No                                                              | 393 (77.8) | Reference              |          | Reference            |          |
| Yes                                                             | 112 (22.2) | 0.65 (0.40 – 1.10)     | 0.104    | 0.70 (0.38 – 1.29)   | 0.249    |
| <b>Comfortability texting friend about HIVST</b>                |            |                        |          |                      |          |
| No                                                              | 87 (17.2)  | Reference              | <0.001   | Reference            | <0.001   |
| Yes                                                             | 418 (82.8) | 3.37 (1.97 – 5.76)     |          | 3.08 (1.73 – 5.48)   |          |

**Comfortability  
texting friend  
about HIV**

|     |            |                    |        |                    |        |
|-----|------------|--------------------|--------|--------------------|--------|
| No  | 266 (52.7) | Reference          | <0.001 | Reference          | <0.001 |
| Yes | 239 (47.3) | 3.84 (2.20 – 6.72) |        | 3.39 (1.89 – 6.07) |        |

**Aware of National  
HIV Hotline**

|     |            |                    |       |                    |       |
|-----|------------|--------------------|-------|--------------------|-------|
| No  | 487 (96.5) | Reference          | 0.600 | Reference          | 0.713 |
| Yes | 18 (3.6)   | 1.49 (0.33 – 6.60) |       | 1.34 (0.28 – 6.29) |       |

240

241 **Comfortability receiving text message from HIV Counselor following HIVST**

242 In the bivariate analysis, we found that comfortability texting friend about HIVST (OR = 2.52,  
243 95% CI [1.49 – 4.25]) and comfortability texting friend about HIV (OR = 2.96, 95% CI [1.83  
244 – 4.80]) were significantly associated with the probability of participant’s comfortability  
245 receiving text message from HIV counselor following HIVST (Table 3).

246

247 In the multivariate analysis, after for the other predictor variables, we found that history of  
248 receiving HIV-related text message, comfortability texting friend about HIVST, and  
249 comfortability texting friend about HIV remained significantly associated with the probability  
250 of participant’s comfortability talking to a HIV counselor on National HIV Hotline following  
251 HIVST (Table 2). Participants with a previous history of receiving HIV related text message  
252 had 0.59 higher odds of being very comfortable talking to a HIV counselor on National HIV  
253 Hotline following HIVST (aOR = 0.59, 95% CI [0.34 – 1.01]). Participants who reported being  
254 comfortable texting a friend about HIVST had 2.28 higher odds of being very comfortable  
255 talking to a HIV counselor on National HIV Hotline following HIVST (aOR = 2.28, 95% CI  
256 [1.31 – 3.95]). Finally, participants who reported being comfortable texting friend about HIV  
257 had 2.74 higher odds of being very comfortable talking to a HIV counselor on National HIV  
258 Hotline following HIVST (aOR = 2.74, 95% CI [1.66 – 4.53]).

259

260  
261  
262  
263  
264  
265  
266

**Table 3:** Logistic regression of the association between participants’ comfortability receiving text from HIV Counselor following HIVST and predictor variables showing unadjusted and adjusted odds ratio

| <b>Characteristics</b>                                          | <b>n (%)</b> | <b>Unadjusted OR (95% CI)</b> | <b>P -Value</b> | <b>Adjusted OR (95% CI)</b> | <b>P - Value</b> |
|-----------------------------------------------------------------|--------------|-------------------------------|-----------------|-----------------------------|------------------|
| <b>Previous HIV Testing</b>                                     |              |                               |                 |                             |                  |
| No                                                              | 49 (9.7)     | Reference                     |                 | Reference                   |                  |
| Yes                                                             | 456 (90.3)   | 0.77 (0.35 – 1.69)            | 0.515           | 0.73 (0.32 – 1.68)          | 0.464            |
| <b>Access to Mobile Phone</b>                                   |              |                               |                 |                             |                  |
| No                                                              | 10 (2.0)     | Reference                     |                 | Reference                   |                  |
| Yes                                                             | 495 (98.0)   | 0.44 (0.05 – 3.52)            | 0.590           | 0.58 (0.07 – 5.13)          | 0.624            |
| <b>Participants sharing mobile phone with other individuals</b> |              |                               |                 |                             |                  |
| No                                                              | 407 (80.6)   | Reference                     |                 | Reference                   |                  |
| Yes                                                             | 98 (19.4)    | 1.25 (0.70 – 2.22)            | 0.446           | 1.14 (0.61 – 2.10)          | 0.683            |
| <b>History of receiving HIV-related text message</b>            |              |                               |                 |                             |                  |
| No                                                              | 361 (71.5)   | Reference                     | 0.195           | Reference                   | 0.054            |
| Yes                                                             | 144 (28.5)   | 0.73 (0.46 – 1.17)            |                 | 0.59 (0.34 – 1.01)          |                  |
| <b>History of sending friend in camp text message about HIV</b> |              |                               |                 |                             |                  |
| No                                                              | 393 (77.8)   | Reference                     |                 | Reference                   |                  |
| Yes                                                             | 112 (22.2)   | 0.88 (0.52 – 1.48)            | 0.638           | 1.04 (0.58 – 1.88)          | 0.888            |
| <b>Comfortability texting friend about HIVST</b>                |              |                               |                 |                             |                  |
| No                                                              | 87 (17.2)    | Reference                     | 0.001           | Reference                   | 0.003            |
| Yes                                                             | 418 (82.8)   | 2.52 (1.49 – 4.25)            |                 | 2.28 (1.31 – 3.95)          |                  |

**Comfortability  
texting friend  
about HIV**

|     |            |                    |        |                    |        |
|-----|------------|--------------------|--------|--------------------|--------|
| No  | 266 (52.7) | Reference          | <0.001 | Reference          | <0.001 |
| Yes | 239 (47.3) | 2.96 (1.83 – 4.80) |        | 2.74 (1.66 – 4.53) |        |

**Aware of National  
HIV Hotline**

|     |            |                    |       |                    |       |
|-----|------------|--------------------|-------|--------------------|-------|
| No  | 487 (96.5) | Reference          | 0.396 | Reference          | 0.254 |
| Yes | 18 (3.6)   | 0.64 (0.23 – 1.80) |       | 0.53 (0.18 – 1.57) |       |

267

268

269 **Discussion**

270 The overall goal of this study was to assess men’s willingness to use the National HIV  
 271 Hotlines for support with linkage to care following HIV self-testing results in Tanzania. The  
 272 results revealed several significant findings. A vast majority of participants reported having  
 273 access to mobile phones (98.0%), indicating potential feasibility for utilizing mobile health  
 274 (mHealth) interventions such as text messaging for HIV-related communication. These  
 275 findings align with and reinforce the insights gleaned from previous research conducted in  
 276 resource-limited setting (23–27). The studies have consistently demonstrated the extensive use  
 277 of mobile phones even in regions with limited access to traditional healthcare infrastructure.  
 278 The ubiquity of mobile phones in such setting has been pivotal in reaching remote and  
 279 underserved populations with healthcare information and services.

280

281 Regarding the comfortability in engaging with HIV counseling services, participants  
 282 who reported receiving HIV-related text messages in the past were more likely to feel  
 283 comfortable talking to a HIV counselor on the National HIV Hotline following HIVST. This  
 284 underscores the potential influence of previous exposure to HIV-related information and  
 285 communication on individuals' comfort levels in seeking HIV-related services. It also

286 highlights the importance of targeted messaging and communication strategies in promoting  
287 awareness and comfortability with HIV testing and counseling services.

288         Among our study population, the majority of participants (82.77%) expressed comfort  
289 in texting friends about HIVST, which suggests a high level of acceptance and openness  
290 towards discussing HIV-related topics among peers. This finding aligns with previous research  
291 highlighting the importance of social support networks in HIV prevention and care. Peer  
292 influence has been recognized as a cornerstone of effective HIV interventions, Peers often  
293 individuals who share similar life experiences and challenges, can offer unique insights,  
294 empathy, and encouragement. They can play a pivotal role in motivating individuals to take  
295 control of their health and seek essential services, including HIV testing and care (28). Also,  
296 willingness to discuss HIV self-testing with close friends can contribute to reducing stigma  
297 associated with HIV. Peer support can create a sense of belonging and reduce isolation that  
298 some individuals living with HIV may experience (29,30)

299         The study's findings also emphasize the importance of tailored communication and  
300 messaging strategies in promoting comfortability and uptake of HIV-related services,  
301 particularly among young, male populations in Tanzania. By leveraging mobile phone  
302 technology and peer networks, mHealth interventions could play a crucial role in enhancing  
303 access to HIV testing, counseling, and support services, thereby contributing to HIV prevention  
304 and care efforts (31).

305

306 Thus, although this study focused on Men's willingness to use the National HIV Hotlines for  
307 support with linkage to care following HIV self-testing results in Tanzania, there is benefit in  
308 future study investigating both sexual partner's willingness to use the digital health intervention  
309 for HIVST and linkage to care services. As future study could offer additional insight into  
310 whether prior discussion of HIVST with sexual partner could be a potential explanation for the

311 proportion of willingness to use digital health intervention among heterosexual men and their  
312 sexual partners.

313         Although our study had numerous strengths, there were a few limitations. First, the data  
314 originated from a cross-sectional survey and cannot be utilized in assessing the causal  
315 relationship between the variables of interest. Second, the study's overall objective is to inform  
316 the potential for digital health intervention to support HIVST and linkage to care services  
317 however, this study collected data solely from male participants and lacked information on  
318 respondents' sexual partners and their willingness to use digital health intervention for HIVST.  
319 Another limitation was the lack of sexual behavior data, as although the study gathered  
320 information on number of sexual partners within 12 months for each respondent, it did not  
321 include data on sexual behavior for analysis, such as condom use or PrEP use. Finally, the  
322 study findings are not generalizable to other men in Tanzania as participants were recruited  
323 among camps (social networks). Although not generalizable, this is one of few studies to assess  
324 partner-delivered HIVST kit distribution potential among men exposed to peer-led HIV self-  
325 testing education and promotion.

326

## 327 **Conclusion**

328 Our study sheds light on men's willingness to utilize the National HIV Hotlines for support  
329 with linkage to care following HIV self-testing results in Tanzania. The findings underscore  
330 the potential feasibility and acceptance of mobile health (mHealth) interventions, particularly  
331 text messaging, in facilitating HIV-related communication and service uptake among men in  
332 resource-limited settings. The ubiquity of mobile phones among participants highlights the  
333 opportunity to leverage digital health technologies to reach remote and underserved  
334 populations with HIV testing, counseling, and support services. Moreover, our findings  
335 emphasize the influence of previous exposure to HIV-related information and communication

336 on individuals' comfort levels in seeking HIV counseling services, indicating the importance  
337 of targeted messaging strategies. Furthermore, the high level of acceptance and openness  
338 towards discussing HIV-related topics among peers underscores the significance of peer  
339 support networks in HIV prevention and care. Leveraging peer influence and social networks  
340 can contribute to reducing stigma associated with HIV, promoting HIV testing uptake, and  
341 facilitating linkage to care.

342

343 However, the study has limitations, the focus solely on male participants limits the  
344 generalizability of the findings to other populations, particularly sexual partners. Future  
345 research should explore both partners' willingness to use digital health interventions for HIV  
346 self-testing and linkage to care services to provide a more comprehensive understanding of the  
347 potential impact of such interventions.

348

349 Despite these limitations, our study contributes to the growing body of evidence on the  
350 feasibility and acceptability of the National HIV Hotlines for HIV testing and linkage to care  
351 in resource-limited settings. By addressing barriers to HIV service uptake and leveraging  
352 digital health technologies, we can advance HIV prevention and care efforts and work towards  
353 achieving the goals of HIV epidemic control.

354

## 355 **Abbreviations**

356 AIDS: Acquired Immune Deficiency Syndrome;

357 HIV: Human Immunodeficiency Virus;

358 HIVST: HIV self-testing

359 STEP: Self-Testing Education and Promotion;

360 mHealth: Mobile Health

361



## 362 **Acknowledgement and Declarations**

363 Funding: This study was supported by grants from the National Institute of Mental Health  
364 (Grant #R00MH110343: PI: DFC) and Minority Health International Research Training  
365 (MHIRT) (Grant T37-MD001448) from the National Institute on Minority Health and Health  
366 Disparities, National Institutes of Health (NIH), Bethesda, MD, USA.

367

## 368 **Competing Interests**

369 No competing of interests

## 370 **Ethics approval and consent to participate**

371 This study utilized secondary data collected from the previous STEP project, which was  
372 implemented starting in 2018. The initial ethics approval for that project was obtained from the  
373 University of South Carolina, covering the period from May 2017 to May 2018, during which  
374 data collection took place. The project received approval from different institutions due to the  
375 Principal Investigator (PI) shifting institutions during the project. Specifically, the project was  
376 reviewed and approved by the institutional review boards of the University of South Carolina  
377 (approval period: 5/16/2017 to 5/15/2018), the National Institute of Medical Research of  
378 Tanzania (NIMR/HQ/R.8c/Vol.I/1170, approval period: 29th June 2017 to 28th June 2018),  
379 and George Washington University in 2021. All respondents provided written informed  
380 consent prior to participation in the original study. All study procedures were performed in  
381 accordance with the ethical standards of the institutional and/or national research committees  
382 and the 1964 Helsinki Declaration and its later amendments or comparable ethical standards.

383 For our current study, which involves secondary analysis of this already collected data, we did  
384 not seek an extension of the original ethics approval. According to the guidelines of our  
385 institutional review boards and standard ethical practices, secondary data analysis does not  
386 typically require new or extended ethics approval provided the data was collected ethically and  
387 anonymized appropriately, with no new data collection involving human subjects being  
388 undertaken.

389

390

391 **Reference:**

- 392 1. UNAIDS Geneva. UNAIDS report on the global AIDS epidemic shows that 2020  
393 targets will not be met because of deeply unequal success; COVID-19 risks blowing  
394 HIV progress way off course. Un aids [Internet]. 2020;5–7. Available from:  
395 [https://www.unaids.org/en/resources/presscentre/pressreleaseandstatementarchive/2020/july/20200706\\_global-aids-report](https://www.unaids.org/en/resources/presscentre/pressreleaseandstatementarchive/2020/july/20200706_global-aids-report)  
396  
397 2. Un aids. F A C T S H E E T 2 0 2 2.  
398 3. Decker MR, Lyons C, Guan K, Mosenge V, Fouda G, Levitt D, et al. A Systematic  
399 Review of Gender-Based Violence Prevention and Response Interventions for HIV  
400 Key Populations: Female Sex Workers, Men Who Have Sex with Men, and People  
401 Who Inject Drugs. *Trauma Violence Abuse*. 2022 Apr 1;23(2):676–94.  
402 4. Ingold H, Mwerinde O, Ross AL, Leach R, Corbett EL, Hatzold K, et al. The Self-  
403 Testing AfRica (STAR) Initiative: accelerating global access and scale-up of HIV self-  
404 testing. 2019; Available from:  
405 <http://onlinelibrary.wiley.com/doi/10.1002/jia2.25249/full>  
406 5. Ma P, Shoki R, Su X, Ota E. Implementation strategies to promote linkage to care for  
407 key populations after HIV self-testing: a scoping review. *J Glob Health Rep*. 2022 Dec  
408 5;6.  
409 6. LeGrand S, Muessig KE, Horvath KJ, Rosengren AL, Hightow-Weidman LB. Using  
410 technology to support HIV self-testing among MSM. *Curr Opin HIV AIDS*.  
411 2017;12(5):425–31.  
412 7. Tahlil KM, Ong JJ, Rosenberg NE, Tang W, Conserve DF, Nkengasong S, et al.  
413 Verification of HIV Self-Testing Use and Results: A Global Systematic Review. *AIDS*  
414 *Patient Care STDS*. 2020;34(4):147–56.  
415 8. Matovu JKB, Mbita G, Hamilton A, Mhando F, Sims WM, Thompson N, et al. Men’s  
416 comfort in distributing or receiving HIV self-test kits from close male social network  
417 members in Dar Es Salaam, Tanzania: baseline results from the STEP project. *BMC*  
418 *Public Health*. 2021;21(1):1–11.  
419 9. Harichund C. Acceptability of HIV Self-Testing in Sub-Saharan Africa: Scoping  
420 Study. *AIDS Behav*. 2018;22(2):560–8.  
421 10. Conserve DF, Muessig KE, Maboko LL, Shirima S, Kilonzo MN, Maman S, et al.  
422 Mate yako afa yako: Formative research to develop the Tanzania HIV self-testing  
423 education and promotion (Tanzania STEP) project for men. *PLoS One*. 2018;13(8):1–  
424 17.  
425 11. Romero RA, Klausner JD, Marsch LA, Young SD. Technology-Delivered Intervention  
426 Strategies to Bolster HIV Testing. *Curr HIV/AIDS Rep*. 2021;18(4):391–405.  
427 12. Ibitoye M, Lappen H, Freeman R, Jordan AE, Aronson ID. Technology-Based  
428 Interventions to Increase Point-of-Care HIV Testing and Linkage to Care Among  
429 Youth in the US: A Systematic Review. Vol. 25, *AIDS and Behavior*. Springer; 2021.  
430 p. 1829–38.  
431 13. Indravudh PP, Choko AT, Corbett EL. Scaling up HIV self-testing in sub-Saharan  
432 Africa: A review of technology, policy and evidence. Vol. 31, *Current Opinion in*  
433 *Infectious Diseases*. Lippincott Williams and Wilkins; 2018. p. 14–24.  
434 14. You WX, Comins CA, Jarrett BA, Young K, Guddera V, Phetlhu DR, et al.  
435 Facilitators and barriers to incorporating digital technologies into HIV care among  
436 cisgender female sex workers living with HIV in South Africa. *Mhealth*. 2020  
437 Apr;6:15–15.  
438 15. LeGrand S, Muessig KE, Horvath KJ, Rosengren AL, Hightow-Weidman LB. Using  
439 technology to support HIV self-testing among MSM. Vol. 12, *Current Opinion in HIV*  
440 *and AIDS*. Lippincott Williams and Wilkins; 2017. p. 425–31.

- 441 16. Ngowi K, Pima F, Mmbaga BT, Aarnoutse RE, Reiss P, Nieuwkerk PT, et al. “I Wish  
442 to Continue Receiving the Reminder Short Messaging Service”: A Mixed Methods  
443 Study on the Acceptability of Digital Adherence Tools Among Adults Living with  
444 HIV on Antiretroviral Treatment in Tanzania. *Patient Prefer Adherence*. 2021;15:559–  
445 68.
- 446 17. Ngowi KM, Minja L, Boer IMS de, Aarnoutse RE, Masika L, Sprangers MAG, et al.  
447 Predicting viral load suppression by self-reported adherence, pharmacy refill counts  
448 and real time medication monitoring among people living with HIV in Tanzania. *AIDS*  
449 *Res Ther*. 2022 Dec 1;19(1).
- 450 18. Sumari-De Boer IM, Ngowi KM, Sonda TB, Pima FM, Masika L V, Sprangers MAG,  
451 et al. Effect of Digital Adherence Tools on Adherence to Antiretroviral Treatment  
452 Among Adults Living With HIV in Kilimanjaro, Tanzania: A Randomized Controlled  
453 Trial [Internet]. Vol. 87, *J Acquir Immune Defic Syndr*. 2019. Available from:  
454 [www.jaids.com](http://www.jaids.com)
- 455 19. Yamanis TJ, Maman S, Mbwapo JK, Earp JAE, Kajula LJ. Social venues that protect  
456 against and promote HIV risk for young men in Dar es Salaam, Tanzania. *Soc Sci Med*  
457 [Internet]. 2010 Nov [cited 2022 Jun 26];71(9):1601–9. Available from:  
458 <https://pubmed.ncbi.nlm.nih.gov/20846768/>
- 459 20. Matovu JKB, Mbita G, Hamilton A, Mhando F, Sims WM, Thompson N, et al. Men’s  
460 Comfort to Distribute or Receive HIV Self-Test Kits from Close Male Social Network  
461 Members in Tanzania: Baseline Results from the STEP Project. *Research Square*.  
462 2021.
- 463 21. Matovu JKB, Mbita G, Hamilton A, Mhando F, Sims WM, Thompson N, et al. Men’s  
464 comfort in distributing or receiving HIV self-test kits from close male social network  
465 members in Dar Es Salaam, Tanzania: baseline results from the STEP project. *BMC*  
466 *Public Health*. 2021;21(1).
- 467 22. StataCorp. *Stata Statistical Software: Release 16*. . 2019. College Station, TX:  
468 StataCorp LLC;
- 469 23. Marron O, Thomas G, Burdon Bailey JL, Mayer D, Grossman PO, Lohr F, et al.  
470 Factors associated with mobile phone ownership and potential use for rabies  
471 vaccination campaigns in southern Malawi. *Infect Dis Poverty*. 2020 Jun 5;9(1).
- 472 24. McCool J, Dobson R, Muinga N, Paton C, Pagliari C, Agawal S, et al. Factors  
473 influencing the sustainability of digital health interventions in low-resource settings:  
474 Lessons from five countries. *J Glob Health*. 2020 Dec 1;10(2).
- 475 25. Adong J, Fatch R, Emenyonu N, Muyindike W, Ngabirano C, Cheng D, et al. Cell  
476 Phone Availability and Usage for mHealth and Intervention Delivery to Persons  
477 Living With HIV in a Low-Resource Setting: Cross-sectional Study. *JMIR Form Res*.  
478 2022 Aug 1;6(8).
- 479 26. Nouri SS, Avila-Garcia P, Cembali AG, Sarkar U, Aguilera A, Lyles CR. Assessing  
480 mobile phone digital literacy and engagement in user-centered design in a diverse,  
481 safety-net population: Mixed methods study. *JMIR Mhealth Uhealth*. 2019;7(8).
- 482 27. Wali S, Hussain-Shamsy N, Ross H, Cafazzo J. Investigating the use of mobile health  
483 interventions in vulnerable populations for cardiovascular disease management:  
484 Scoping review. Vol. 7, *JMIR mHealth and uHealth*. JMIR Publications Inc.; 2019.
- 485 28. Oldenburg CE, Ortblad KF, Chanda MM, Mwanda K, Nicodemus W, Sikaundi R, et  
486 al. *Zambian Peer Educators for HIV Self-Testing (ZEST) study: Rationale and design*  
487 of a cluster randomised trial of HIV self-testing among female sex workers in Zambia.  
488 *BMJ Open*. 2017 Apr 1;7(4).
- 489 29. Ikeda DJ, Nyblade L, Srithanaviboonchai K, Agins BD. A quality improvement  
490 approach to the reduction of HIV-related stigma and discrimination in healthcare  
491 settings. *BMJ Glob Health*. 2019 Jun 1;4(3).

- 492 30. Chinouya MJ, Adeyanju O. A disease called stigma: the experience of stigma among  
493 African men with TB diagnosis in London. *Public Health*. 2017 Apr 1;145:45–50.
- 494 31. Zhu X, Zhang W, Operario D, Zhao Y, Shi A, Zhang Z, et al. Effects of a Mobile  
495 Health Intervention to Promote HIV Self-testing with MSM in China: A Randomized  
496 Controlled Trial. *AIDS Behav*. 2019 Nov 1;23(11):3129–39.  
497  
498
